# Supplementary material for: A consistent glacier inventory for the Karakoram and Pamir regions derived from Landsat data: distribution of debris cover and mapping challenges
Source: Copernicus journal article supplement (doi:10.5194/essd-2018-35), 2018-04-05

# Supplement

Fig. S1: Glacier slope vs. glacier size :

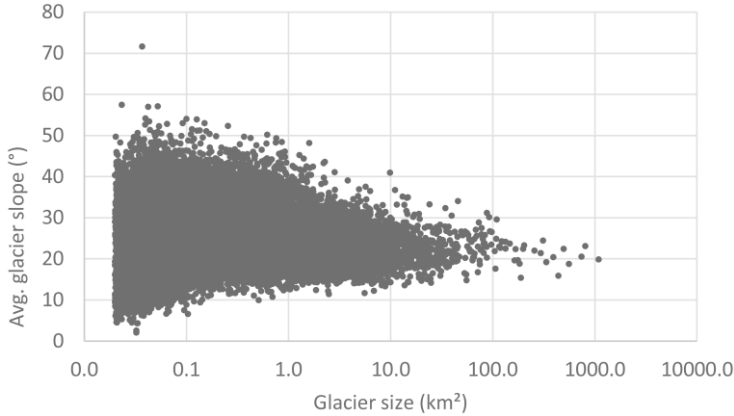

Fig. S2: Multiple digitising experiment example 'debris, shadow, rock glacier' :

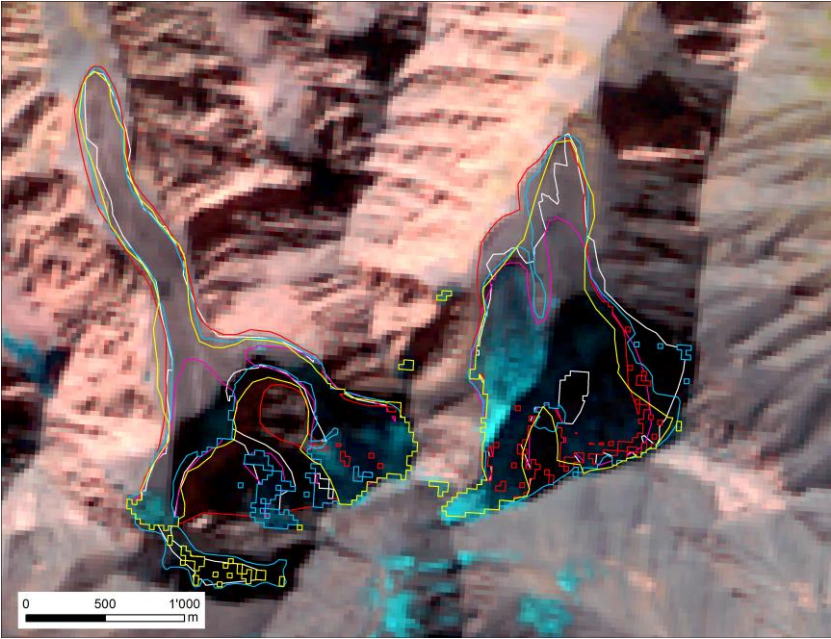

Supplement: Supplementary file 1 [file essd-2018-35-supplement.pdf]
